# Supplementary material
Source: PubMed Central journal article supplement (PMC3766440)

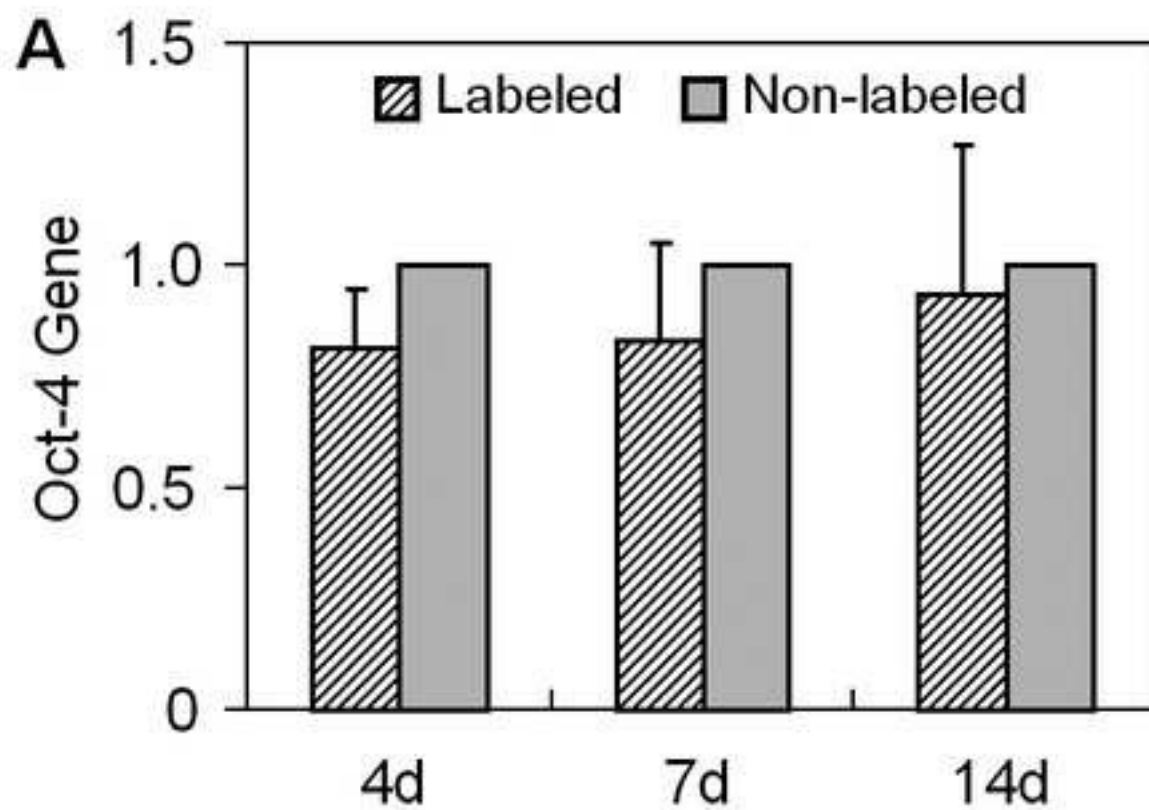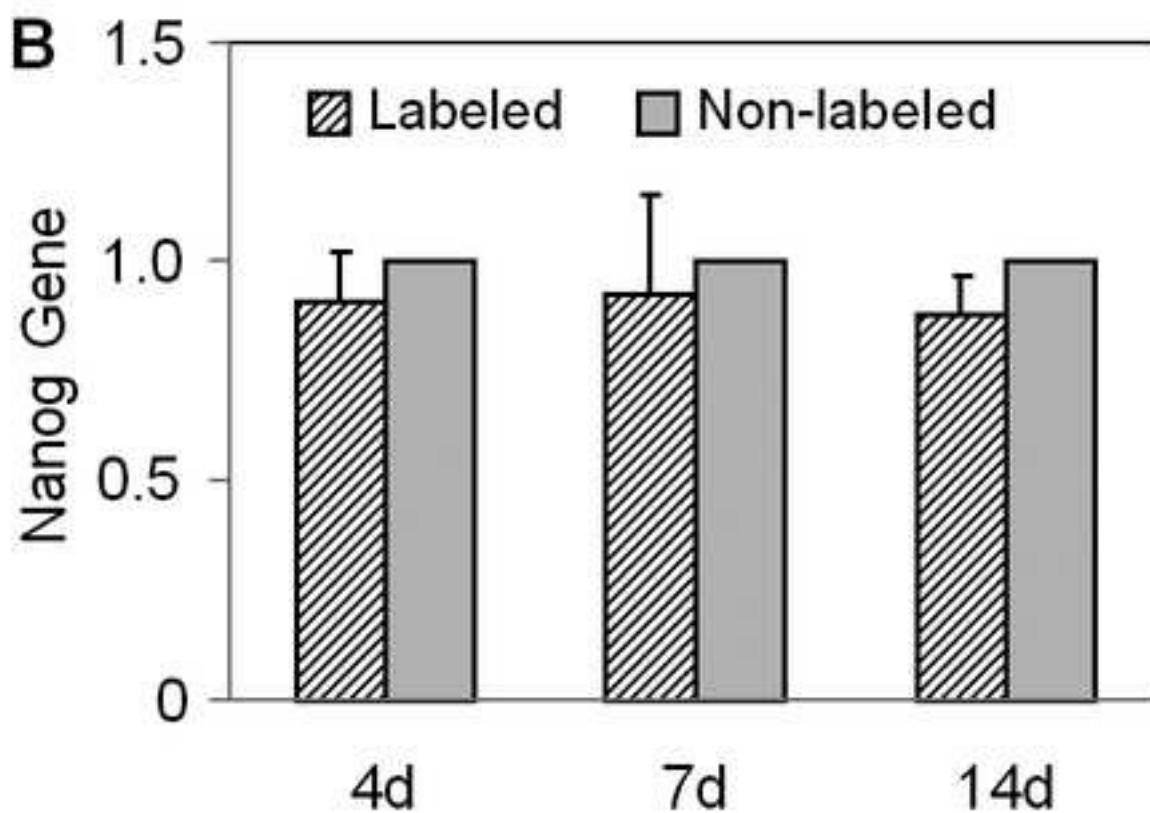

Supplement: NIHMS463361-supplement-10439_2013_802_MOESM1_ESM.pdf [file NIHMS463361-supplement-10439_2013_802_MOESM1_ESM.pdf]
